# Supplementary material for: A Phase I, Open-Label, Dose-Escalation Study of the OX40 Agonist Ivuxolimab in Patients with Locally Advanced or Metastatic Cancers
Source: Oxford University Press journal article supplement (doi:10.1158/1078-0432.ccr-21-0845), 2021-10-06
Supplement: ccr-21-0845_supps1.docx [file ccr-21-0845_supps1.docx]

| **Supplementary Table S1.** Summary of treatment-emergent AEs occurring in >10% of patients (all cycles) | | | | | | |
| --- | --- | --- | --- | --- | --- | --- |
| **Preferred Term** | **Grade 1**  **n (%)** | **Grade 2**  **n (%)** | **Grade 3**  **n (%)** | **Grade 4**  **n (%)** | **Grade 5**  **n (%)** | **Total**  **n (%)** |
| Any AEs | 7 (13.5) | 21 (40.4) | 21 (40.4) | 2 (3.8) | 1 (1.9) | 52 (100.0) |
| Fatigue | 12 (23.1) | 12 (23.1) | 0 (0.0) | 0 (0.0) | 0 (0.0) | 24 (46.2) |
| Nausea | 9 (17.3) | 6 (11.5) | 0 (0.0) | 0 (0.0) | 0 (0.0) | 15 (28.8) |
| Decreased appetite | 8 (15.4) | 4 (7.7) | 1 (1.9) | 0 (0.0) | 0 (0.0) | 13 (25.0) |
| Pruritus | 8 (15.4) | 4 (7.7) | 0 (0.0) | 0 (0.0) | 0 (0.0) | 12 (23.1) |
| Anemia | 3 (5.8) | 8 (15.4) | 0 (0.0) | 0 (0.0) | 0 (0.0) | 11 (21.2) |
| AST increased | 5 (9.6) | 2 (3.8) | 4 (7.7) | 0 (0.0) | 0 (0.0) | 11 (21.2) |
| Abdominal pain | 7 (13.5) | 3 (5.8) | 0 (0.0) | 0 (0.0) | 0 (0.0) | 10 (19.2) |
| Constipation | 3 (5.8) | 6 (11.5) | 1 (1.9) | 0 (0.0) | 0 (0.0) | 10 (19.2) |
| Dyspnea | 8 (15.4) | 2 (3.8) | 0 (0.0) | 0 (0.0) | 0 (0.0) | 10 (19.2) |
| Chills | 9 (17.3) | 0 (0.0) | 0 (0.0) | 0 (0.0) | 0 (0.0) | 9 (17.3) |
| Headache | 8 (15.4) | 1 (1.9) | 0 (0.0) | 0 (0.0) | 0 (0.0) | 9 (17.3) |
| Vomiting | 6 (11.5) | 2 (3.8) | 1 (1.9) | 0 (0.0) | 0 (0.0) | 9 (17.3) |
| Cough | 6 (11.5) | 2 (3.8) | 0 (0.0) | 0 (0.0) | 0 (0.0) | 8 (15.4) |
| Diarrhea | 4 (7.7) | 4 (7.7) | 0 (0.0) | 0 (0.0) | 0 (0.0) | 8 (15.4) |
| Pyrexia | 7 (13.5) | 1 (1.9) | 0 (0.0) | 0 (0.0) | 0 (0.0) | 8 (15.4) |
| ALT increased | 6 (11.5) | 0 (0.0) | 1 (1.9) | 0 (0.0) | 0 (0.0) | 7 (13.5) |
| Back pain | 4 (7.7) | 2 (3.8) | 0 (0.0) | 0 (0.0) | 0 (0.0) | 6 (11.5) |
| Blood bilirubin increased | 3 (5.8) | 1 (1.9) | 2 (3.8) | 0 (0.0) | 0 (0.0) | 6 (11.5) |
| Dizziness | 6 (11.5) | 0 (0.0) | 0 (0.0) | 0 (0.0) | 0 (0.0) | 6 (11.5) |
| Fall | 3 (5.8) | 2 (3.8) | 1 (1.9) | 0 (0.0) | 0 (0.0) | 6 (11.5) |
| Insomnia | 3 (5.8) | 3 (5.8) | 0 (0.0) | 0 (0.0) | 0 (0.0) | 6 (11.5) |
