# Supplementary material for: A Phase I, Open-Label, Dose-Escalation Study of the OX40 Agonist Ivuxolimab in Patients with Locally Advanced or Metastatic Cancers
Source: PubMed Central journal article supplement — Clin Cancer Res. 2021 Oct 6;28(1):71–83. doi: 10.1158/1078-0432.CCR-21-0845 (PMC9401502; doi:10.1158/1078-0432.ccr-21-0845), 2021-10-06
Supplement: ccr-21-0845_supps1.pdf [file ccr-21-0845_supps1.pdf]

### Supplementary figure S1.

Mean ( $\pm$  SE) concentration-time profiles for ivuxolimab following IV infusion (Q2W) at cycle 1 and cycle 3.

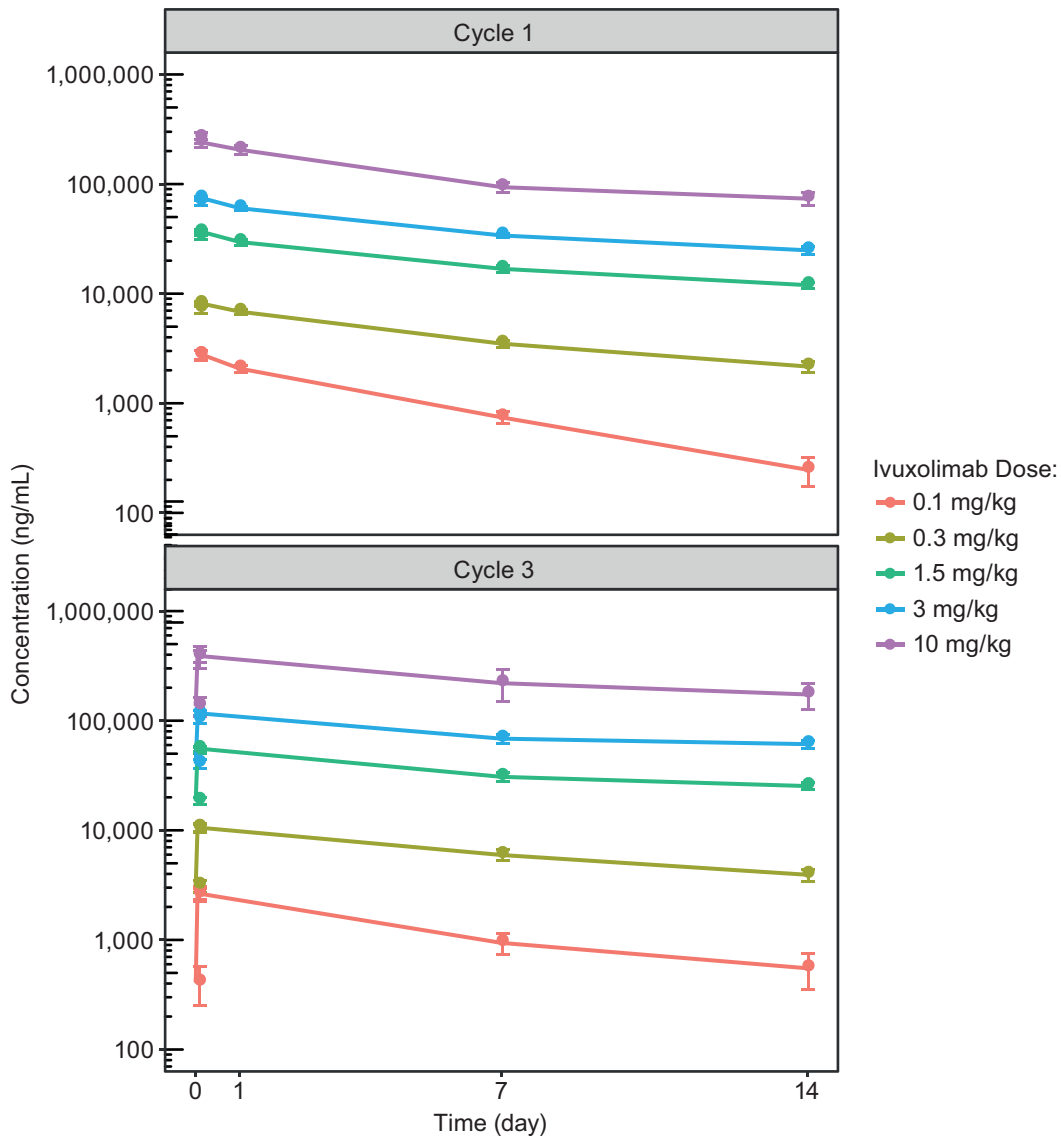

Q2W, every 2 weeks; IV, intravenous; SE, standard error
