# Supplementary material for: A Phase I, Open-Label, Dose-Escalation Study of the OX40 Agonist Ivuxolimab in Patients with Locally Advanced or Metastatic Cancers
Source: PubMed Central journal article supplement — Clin Cancer Res. 2021 Oct 6;28(1):71–83. doi: 10.1158/1078-0432.CCR-21-0845 (PMC9401502; doi:10.1158/1078-0432.ccr-21-0845), 2021-10-06
Supplement: ccr-21-0845_supps3.pdf [file ccr-21-0845_supps3.pdf]

### Supplementary figure S3.

Clonal expansion of CD4+ and CD8+ T cells at doses 0.1–3.0 mg/kg from baseline to week 6 of ivixolimab treatment.

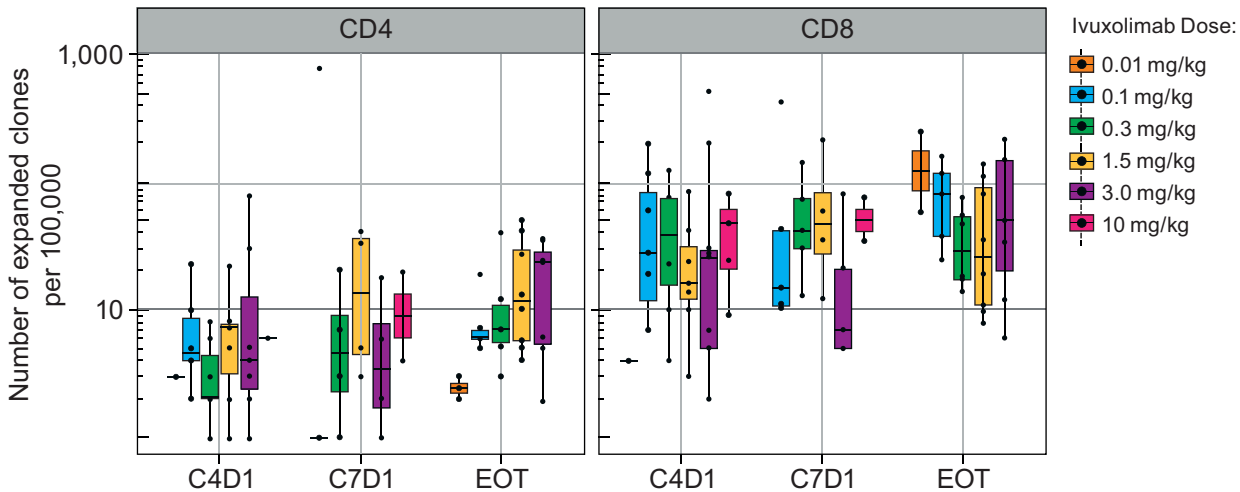

C, cycle; D, day; EOT, end of treatment.
