# Supplementary material for: A Phase I, Open-Label, Dose-Escalation Study of the OX40 Agonist Ivuxolimab in Patients with Locally Advanced or Metastatic Cancers
Source: PubMed Central journal article supplement — Clin Cancer Res. 2021 Oct 6;28(1):71–83. doi: 10.1158/1078-0432.CCR-21-0845 (PMC9401502; doi:10.1158/1078-0432.ccr-21-0845), 2021-10-06
Supplement: ccr-21-0845_supps4.pdf [file ccr-21-0845_supps4.pdf]

### Supplementary figure S4.

Expansion of peripheral blood T-cell clones, by response to ivuxolimab.

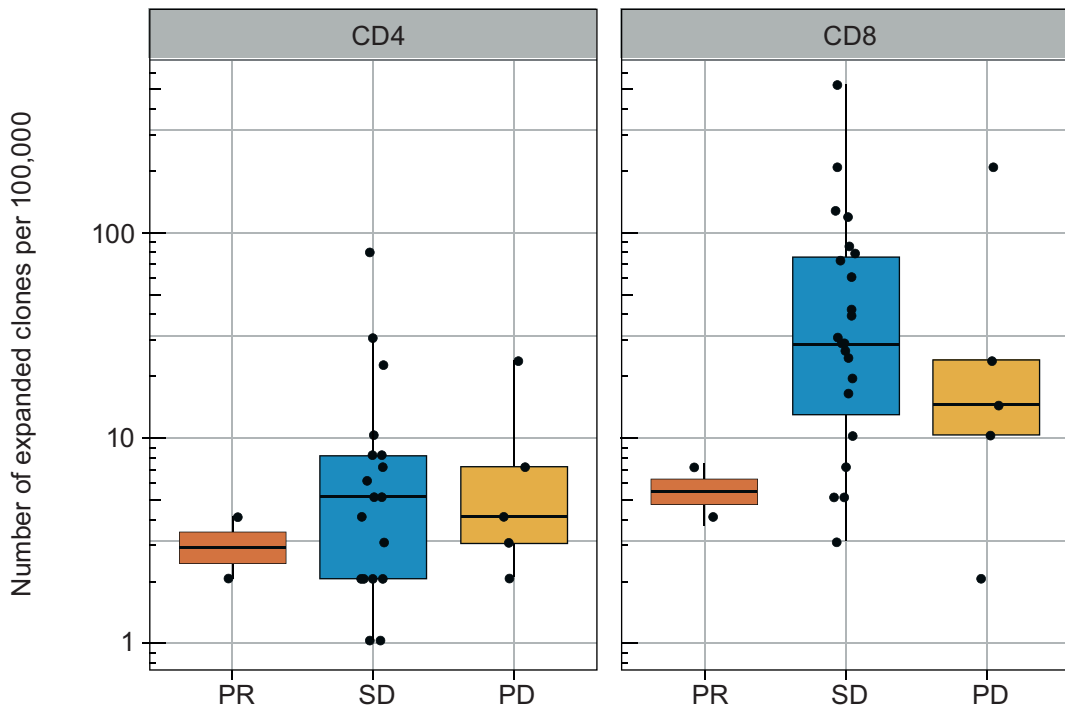

Number of unique TCR- $\beta$  clones per 100,000 with a significant increase in frequency from baseline to week 6 (y-axis) is depicted in patients grouped by RECIST response (x-axis). Significance was determined after applying a Benjamini-Hochberg multiple testing correction to all  $P$  values with an  $\alpha$  threshold of 1%.

PD, progressive disease; PR, partial response; SD, stable disease; TCR, T-cell receptor
